# Supplementary material for: When to use matching and weighting or regression in instrumental variable estimation? Evidence from college proximity and returns to college
Source: Springer Nature journal article supplement (doi:10.1007/s00181-023-02441-7), 2023-06-08
Supplement: MOESM2 [file 25465768]

rm(list=ls())

library(haven)
library(Matching)  
library(CBPS)
#library(ATE)
library(WeightIt)
library(optweight)
library(AER)
library(boot)
library(xtable)
library(np)
library(IPS)

######Replication code of Heiler (2021)######
lossfct <- function(theta,z,x){
  L <- 1/( 1 + exp(-x%*%theta) )
  S <- (2*z - 1)*log(L/(1-L)) +
    - (z - L)*( 1/L - 1/(1-L) )
  return(mean(S))
}

lossgrad <- function(theta,z,x){
  L <- 1/( 1 + exp(-x%*%theta) )
  W <- (z-L)/(L*(1-L))
  return(colMeans(((matrix(rep(W,NCOL(x)),ncol = NCOL(x))) * (x))))
}

f_late <- function(y,d,z,p){
  late <- (sum(y*z/p) - sum(y*(1-z)/(1-p)))/(sum(d*z/p) - sum(d*(1-z)/(1-p)))
  return(late)
}

#####loo-cverr 
library(lbfgs)
library(foreach)
library(doParallel)
library(parallel)

#numCores <- detectCores()
#cl <- makeCluster(6)
#registerDoParallel(cl)
#stopCluster(cl)

cverr1 <- function(x,z){
  par <- matrix(0,dim(x)[2],1)
  n <- NROW(z)
  grid <- seq(1,n) 
  if (dim(x)[2] < 2) {
    return("X dimension has to be at least 2 (includig intercept if used)")
  }
  else {
    
    cv <-  foreach(i = grid, .combine=rbind, 
                   .packages = "lbfgs", 
                   .export = c("lossfct","lossgrad","x","z","par")) %dopar% {
                     #define data
                     x_ <- x[-i,] 
                     z_ <- z[-i]  
                     #estimate paramter
                     f_loss <- function(theta){-lossfct(theta,z_,x_)}
                     f_grad <- function(theta){-lossgrad(theta,z_,x_)}
                     
                     opt2_ <- lbfgs(f_loss , f_grad, par)
                     
                     #oos evaluation
                     lossfct(as.matrix(opt2_$par,length(opt2_$par),1),z[i],x[i,]) 
                   }
    
    return(cv)
  }
}

setwd("/Users/stefantubbickeemp_lokal/Dropbox/02_IVmatching/")

#set no.of bootstrap reps
B<-999


###########################Full sample###########################


CARD <- read_dta("/Users/stefantubbickeemp_lokal/Dropbox/02_IVmatching/CARD_ready_for_R.dta")

D <- CARD$educ
Z <- CARD$nearc4
X1 <- as.matrix(cbind(CARD[,4:17])) 
X2 <- as.matrix(cbind(CARD[,21:40])) 
Y<-CARD$lwage


#Obtain point estimates of the LATE using the Efficient Covariate Balancing approach by Heiler (2021)

#####CARD's specification

#logit (for starting values)
logit1 <- glm(Z ~ -1 +X1, family = "binomial"(link = "logit"))
p_log1 <- logit1$fitted.values

#bal
theta <- as.matrix(logit1$coefficients,length(logit1$coefficients),1)
f_loss <- function(theta){-lossfct(theta,Z,X1)}
f_grad <- function(theta){-lossgrad(theta,Z,X1)}
balances <- optim(theta, f_loss , gr = f_grad,method = "BFGS", control = list(maxit = 500))
p_bal1 <- 1/ ( 1 + exp(-X1%*%balances$par))

weight_ecb1<-Z/p_bal1 +(1-Z)/(1-p_bal1)
weight_ecb1_vw<-weight_ecb1*p_log1*(1-p_log1)


#test balance
logit1_after <- glm(Z ~ -1 +X1, family = "binomial"(link = "logit"), weights=weight_ecb1)
pseudor2_1<-1-logit1_after$deviance/logit1_after$null.deviance
waldtest1<-waldtest(logit1_after, test = "Chisq")
pval_1<-waldtest1$`Pr(>Chisq)`

res.ecb1.rf<-lm(Y~Z, weights=weight_ecb1)
est.ecb1.rf=res.ecb1.rf$coefficients[2]
res.ecb1.fs<-lm(D~Z, weights=weight_ecb1)
est.ecb1.fs=res.ecb1.fs$coefficients[2]
est.ecb1.rte=est.ecb1.rf/est.ecb1.fs

res.ecb1.rf.vw<-lm(Y~Z, weights=weight_ecb1_vw)
est.ecb1.rf.vw=res.ecb1.rf.vw$coefficients[2]
res.ecb1.fs.vw<-lm(D~Z, weights=weight_ecb1_vw)
est.ecb1.fs.vw=res.ecb1.fs.vw$coefficients[2]
est.ecb1.rte.vw=est.ecb1.rf.vw/est.ecb1.fs.vw

#####Kitagawa's specification

#logit (for starting values)
logit2 <- glm(Z ~ -1 +X2, family = "binomial"(link = "logit"))
p_log2 <- logit2$fitted.values

#bal
theta <- as.matrix(logit2$coefficients,length(logit2$coefficients),1)
f_loss <- function(theta){-lossfct(theta,Z,X2)}
f_grad <- function(theta){-lossgrad(theta,Z,X2)}
balances <- optim(theta, f_loss , gr = f_grad,method = "BFGS", control = list(maxit = 500))
p_bal2 <- 1/ ( 1 + exp(-X2%*%balances$par))

weight_ecb2<-Z/p_bal2 +(1-Z)/(1-p_bal2)
weight_ecb2_vw<-weight_ecb2*p_log2*(1-p_log2)


#test balance
logit2_after <- glm(Z ~ -1 +X2, family = "binomial"(link = "logit"), weights=weight_ecb2)
pseudor2_2<-1-logit2_after$deviance/logit2_after$null.deviance
waldtest2<-waldtest(logit2_after, test = "Chisq")
pval_2<-waldtest2$`Pr(>Chisq)`

res.ecb2.rf<-lm(Y~Z, weights=weight_ecb2)
est.ecb2.rf=res.ecb2.rf$coefficients[2]
res.ecb2.fs<-lm(D~Z, weights=weight_ecb2)
est.ecb2.fs=res.ecb2.fs$coefficients[2]
est.ecb2.rte=est.ecb2.rf/est.ecb2.fs
est.ecb2.rte

res.ecb2.rf.vw<-lm(Y~Z, weights=weight_ecb2_vw)
est.ecb2.rf.vw=res.ecb2.rf.vw$coefficients[2]
res.ecb2.fs.vw<-lm(D~Z, weights=weight_ecb2_vw)
est.ecb2.fs.vw=res.ecb2.fs.vw$coefficients[2]
est.ecb2.rte.vw=est.ecb2.rf.vw/est.ecb2.fs.vw
est.ecb2.rte.vw


#####Kitagawa's specification with reversed instrument
help1<-lm(educ~group_4+group_5+group_6+group_7+group_8+
            group_9+group_10+group_11+group_12+group_13+group_14+group_15+
            group_16+group_19+group_23+group_24+group_25+group_26+group_28, 
          data=CARD[CARD$nearc4==1,])
pred1<-predict(help1, newdata=CARD)

help0<-lm(educ~group_4+group_5+group_6+group_7+group_8+
            group_9+group_10+group_11+group_12+group_13+group_14+group_15+
            group_16+group_19+group_23+group_24+group_25+group_26+group_28, 
          data=CARD[CARD$nearc4==0,])
pred0<-predict(help0, newdata=CARD)

ind=(pred1>=pred0)

Z_rev<-ind*Z+(1-ind)*(1-Z)


#logit (for starting values)
logit3 <- glm(Z_rev ~ -1 +X2, family = "binomial"(link = "logit"))
p_log3 <- logit3$fitted.values

#bal
theta <- as.matrix(logit3$coefficients,length(logit3$coefficients),1)
f_loss <- function(theta){-lossfct(theta,Z_rev,X2)}
f_grad <- function(theta){-lossgrad(theta,Z_rev,X2)}
balances <- optim(theta, f_loss , gr = f_grad,method = "BFGS", control = list(maxit = 500))
p_bal3 <- 1/ ( 1 + exp(-X2%*%balances$par))

weight_ecb3<-Z_rev/p_bal3 +(1-Z_rev)/(1-p_bal3)
weight_ecb3_vw<-weight_ecb3*p_log3*(1-p_log3)


#test balance
logit3_after <- glm(Z_rev ~ -1 +X2, family = "binomial"(link = "logit"), weights=weight_ecb3)
pseudor2_3<-1-logit3_after$deviance/logit3_after$null.deviance
waldtest3<-waldtest(logit3_after, test = "Chisq")
pval_3<-waldtest3$`Pr(>Chisq)`

res.ecb3.rf<-lm(Y~Z_rev, weights=weight_ecb3)
est.ecb3.rf=res.ecb3.rf$coefficients[2]
res.ecb3.fs<-lm(D~Z_rev, weights=weight_ecb3)
est.ecb3.fs=res.ecb3.fs$coefficients[2]
est.ecb3.rte=est.ecb3.rf/est.ecb3.fs
est.ecb3.rte

res.ecb3.rf.vw<-lm(Y~Z_rev, weights=weight_ecb3_vw)
est.ecb3.rf.vw=res.ecb3.rf.vw$coefficients[2]
res.ecb3.fs.vw<-lm(D~Z_rev, weights=weight_ecb3_vw)
est.ecb3.fs.vw=res.ecb3.fs.vw$coefficients[2]
est.ecb3.rte.vw=est.ecb3.rf.vw/est.ecb3.fs.vw
est.ecb3.rte.vw


resmat_orig<-c(est.ecb1.rte, est.ecb1.rf, est.ecb1.fs, est.ecb2.rte, est.ecb2.rf, est.ecb2.fs, est.ecb3.rte, est.ecb3.rf, est.ecb3.fs)
resmat_orig_vw<-c(est.ecb1.rte.vw, est.ecb1.rf.vw, est.ecb1.fs.vw, est.ecb2.rte.vw, est.ecb2.rf.vw, est.ecb2.fs.vw, est.ecb3.rte.vw, est.ecb3.rf.vw, est.ecb3.fs.vw)


pscore_ecb<-as.data.frame(cbind(Z, Z_rev, p_bal1, p_bal2, p_bal3))
write_dta(pscore_ecb, "pscore_ecb.dta")

#Obtain S.E. of LATEs via bootstrapping
n<-length(Y)
est_bs<-matrix(, nrow = B, ncol = 9)
est_bs_vw<-matrix(, nrow = B, ncol = 9)

set.seed(1234)

for (b in seq(1,B)){  
  
  print(b/B)
  #get data
  d <- CARD[sample(nrow(CARD), n, replace=TRUE),]
  
  #define vectors
  D <- d$educ
  X1 <- as.matrix(cbind(d[,4:17])) 
  X2 <- as.matrix(cbind(d[,21:39])) 
  Z <- d$nearc4
  Y <- d$lwage 
  
  
  #####CARD's specification
  try({
    #logit (for starting values)
    logit1 <- glm(Z ~ -1 +X1, family = "binomial"(link = "logit"))
    p_log1 <- logit1$fitted.values
    
    #bal
    theta <- as.matrix(logit1$coefficients,length(logit1$coefficients),1)
    f_loss <- function(theta){-lossfct(theta,Z,X1)}
    f_grad <- function(theta){-lossgrad(theta,Z,X1)}
    balances <- optim(theta, f_loss , gr = f_grad,method = "BFGS", control = list(maxit = 500))
    p_bal1 <- 1/ ( 1 + exp(-X1%*%balances$par))
    
    weight_ecb1<-Z/p_bal1 +(1-Z)/(1-p_bal1)
    weight_ecb1_vw<-weight_ecb1*p_log1*(1-p_log1)
    
    res.ecb1.rf<-lm(Y~Z, weights=weight_ecb1)
    est.ecb1.rf=res.ecb1.rf$coefficients[2]
    res.ecb1.fs<-lm(D~Z, weights=weight_ecb1)
    est.ecb1.fs=res.ecb1.fs$coefficients[2]
    est.ecb1.rte=est.ecb1.rf/est.ecb1.fs
    
    res.ecb1.rf.vw<-lm(Y~Z, weights=weight_ecb1_vw)
    est.ecb1.rf.vw=res.ecb1.rf.vw$coefficients[2]
    res.ecb1.fs.vw<-lm(D~Z, weights=weight_ecb1_vw)
    est.ecb1.fs.vw=res.ecb1.fs.vw$coefficients[2]
    est.ecb1.rte.vw=est.ecb1.rf.vw/est.ecb1.fs.vw

    
    est_bs[b,1] <- est.ecb1.rte
    est_bs[b,2] <- est.ecb1.rf
    est_bs[b,3] <- est.ecb1.fs
    
    est_bs_vw[b,1] <- est.ecb1.rte.vw
    est_bs_vw[b,2] <- est.ecb1.rf.vw
    est_bs_vw[b,3] <- est.ecb1.fs.vw
  }, silent=T)
  
  
  #####Kitagawa's specification
  try({
    
    #logit (for starting values)
    logit2 <- glm(Z ~ -1 +X2, family = "binomial"(link = "logit"))
    p_log2 <- logit2$fitted.values
    
    #bal
    theta <- as.matrix(logit2$coefficients,length(logit2$coefficients),1)
    f_loss <- function(theta){-lossfct(theta,Z,X2)}
    f_grad <- function(theta){-lossgrad(theta,Z,X2)}
    balances <- optim(theta, f_loss , gr = f_grad,method = "BFGS", control = list(maxit = 500))
    p_bal2 <- 1/ ( 1 + exp(-X2%*%balances$par))
    
    weight_ecb2<-Z/p_bal2 +(1-Z)/(1-p_bal2)
    weight_ecb2_vw<-weight_ecb2*p_log2*(1-p_log2)
    
    
    res.ecb2.rf<-lm(Y~Z, weights=weight_ecb2)
    est.ecb2.rf=res.ecb2.rf$coefficients[2]
    res.ecb2.fs<-lm(D~Z, weights=weight_ecb2)
    est.ecb2.fs=res.ecb2.fs$coefficients[2]
    est.ecb2.rte=est.ecb2.rf/est.ecb2.fs

    res.ecb2.rf.vw<-lm(Y~Z, weights=weight_ecb2_vw)
    est.ecb2.rf.vw=res.ecb2.rf.vw$coefficients[2]
    res.ecb2.fs.vw<-lm(D~Z, weights=weight_ecb2_vw)
    est.ecb2.fs.vw=res.ecb2.fs.vw$coefficients[2]
    est.ecb2.rte.vw=est.ecb2.rf.vw/est.ecb2.fs.vw
  
    est_bs[b,4] <- est.ecb2.rte
    est_bs[b,5] <- est.ecb2.rf
    est_bs[b,6] <- est.ecb2.fs
    
    est_bs_vw[b,4] <- est.ecb2.rte.vw
    est_bs_vw[b,5] <- est.ecb2.rf.vw
    est_bs_vw[b,6] <- est.ecb2.fs.vw
  }, silent=T)
  
  
  #####Kitagawa's specification with reversed instrument
  try({
    
    help1<-lm(educ~group_4+group_5+group_6+group_7+group_8+
                group_9+group_10+group_11+group_12+group_13+group_14+group_15+
                group_16+group_19+group_23+group_24+group_25+group_26+group_28, 
              data=d[d$nearc4==1,])
    pred1<-predict(help1, newdata=d)
    
    help0<-lm(educ~group_4+group_5+group_6+group_7+group_8+
                group_9+group_10+group_11+group_12+group_13+group_14+group_15+
                group_16+group_19+group_23+group_24+group_25+group_26+group_28, 
              data=d[d$nearc4==0,])
    pred0<-predict(help0, newdata=d)
    
    
    ind=(pred1>=pred0)
    
    Z_rev<-ind*Z+(1-ind)*(1-Z)
    
    
    #logit (for starting values)
    logit3 <- glm(Z_rev ~ -1 +X2, family = "binomial"(link = "logit"))
    p_log3 <- logit3$fitted.values
    
    #bal
    theta <- as.matrix(logit3$coefficients,length(logit3$coefficients),1)
    f_loss <- function(theta){-lossfct(theta,Z_rev,X2)}
    f_grad <- function(theta){-lossgrad(theta,Z_rev,X2)}
    balances <- optim(theta, f_loss , gr = f_grad,method = "BFGS", control = list(maxit = 500))
    p_bal3 <- 1/ ( 1 + exp(-X2%*%balances$par))
    
    weight_ecb3<-Z_rev/p_bal3 +(1-Z_rev)/(1-p_bal3)
    weight_ecb3_vw<-weight_ecb3*p_log3*(1-p_log3)
    
    
    res.ecb3.rf<-lm(Y~Z_rev, weights=weight_ecb3)
    est.ecb3.rf=res.ecb3.rf$coefficients[2]
    res.ecb3.fs<-lm(D~Z_rev, weights=weight_ecb3)
    est.ecb3.fs=res.ecb3.fs$coefficients[2]
    est.ecb3.rte=est.ecb3.rf/est.ecb3.fs
    
    res.ecb3.rf.vw<-lm(Y~Z_rev, weights=weight_ecb3_vw)
    est.ecb3.rf.vw=res.ecb3.rf.vw$coefficients[2]
    res.ecb3.fs.vw<-lm(D~Z_rev, weights=weight_ecb3_vw)
    est.ecb3.fs.vw=res.ecb3.fs.vw$coefficients[2]
    est.ecb3.rte.vw=est.ecb3.rf.vw/est.ecb3.fs.vw
    
    est_bs[b,7] <- est.ecb3.rte
    est_bs[b,8] <- est.ecb3.rf
    est_bs[b,9] <- est.ecb3.fs
    
    est_bs_vw[b,7] <- est.ecb3.rte.vw
    est_bs_vw[b,8] <- est.ecb3.rf.vw
    est_bs_vw[b,9] <- est.ecb3.fs.vw
  }, silent=T)
  
  
  
}


stderr<-apply(est_bs, 2, sd, na.rm=TRUE)
stderr_vw<-apply(est_bs_vw, 2, sd, na.rm=TRUE)


#generate tables with balancing and main results

balancing_ecb=cbind(c(pseudor2_1, pval_1[2], 0, pseudor2_2, pval_2[2], 0, pseudor2_3, pval_3[2], 0))
rownames(balancing_ecb)<-c("A. Baseline Specification\\ Pseudo-R2", "overall p-value", "No. of individuals off support",
                           "B. Saturated specification\\ Pseudo-R2", "overall p-value", "No. of individuals off support",
                           "C. Saturated specification with reordered instrument\\ Pseudo-R2", "overall p-value", "No. of individuals off support"
)
                           
colnames(balancing_ecb)<-c("IPW(ecb)")

write.table(balancing_ecb, "balancing_ecb.txt")


main_results_ecb=cbind(c(resmat_orig[1], stderr[1], resmat_orig[2], stderr[2], resmat_orig[3], stderr[3],
                         resmat_orig[4], stderr[4], resmat_orig[5], stderr[5], resmat_orig[6], stderr[6],
                         resmat_orig[7], stderr[7], resmat_orig[8], stderr[8], resmat_orig[9], stderr[9]
                         ))
rownames(main_results_ecb)<-c("A. Baseline Specification\\ Return to college", "", "Reduced form effect", "", "First stage effect", "",
                           "B. Saturated specification\\ Return to college", "", "Reduced form effect", "", "First stage effect", "",
                           "C. Saturated specification with reordered instrument\\ Return to college", "", "Reduced form effect", "", "First stage effect", ""
)

colnames(balancing_ecb)<-c("IPW(ecb)")


write.table(main_results_ecb, "main_results_ecb.txt")


###########################Urban sample###########################

CARD <- read_dta("/Users/stefantubbickeemp_lokal/Dropbox/02_IVmatching/CARD_ready_for_R.dta")

CARD<-CARD[CARD$smsa66==1,]

D <- CARD$educ
Z <- CARD$nearc4
X1 <- as.matrix(cbind(CARD[,4:8],CARD[, 10:17]))
X2 <- as.matrix(cbind(CARD[,23:26], CARD[,31:34], CARD[,38:40])) 
Y<-CARD$lwage


#Obtain point estimates of the LATE using the Efficient Covariate Balancing approach by Heiler (2021)

#####CARD's specification

#logit (for starting values)
logit1 <- glm(Z ~ -1 +X1, family = "binomial"(link = "logit"))
p_log1 <- logit1$fitted.values

#bal
theta <- as.matrix(logit1$coefficients,length(logit1$coefficients),1)
f_loss <- function(theta){-lossfct(theta,Z,X1)}
f_grad <- function(theta){-lossgrad(theta,Z,X1)}
balances <- optim(theta, f_loss , gr = f_grad, method="L-BFGS-B", control = list(maxit = 500, trace=1))
p_bal1 <- 1/ ( 1 + exp(-X1%*%balances$par))

weight_ecb1<-Z/p_bal1 +(1-Z)/(1-p_bal1)
weight_ecb1_vw<-weight_ecb1*p_log1*(1-p_log1)

#check:
summary(lm(Z~X1, weights=weight_ecb1))
#does not achieve full balance (independent of optimization method or tolerance for convergence) 
#add control variables to take imbalance into account 

res.ecb1.rf<-lm(Y~Z+X1, weights=weight_ecb1)
est.ecb1.rf=res.ecb1.rf$coefficients[2]
res.ecb1.fs<-lm(D~Z+X1, weights=weight_ecb1)
est.ecb1.fs=res.ecb1.fs$coefficients[2]
est.ecb1.rte=est.ecb1.rf/est.ecb1.fs
est.ecb1.rte

res.ecb1.rf.vw<-lm(Y~Z+X1, weights=weight_ecb1_vw)
est.ecb1.rf.vw=res.ecb1.rf.vw$coefficients[2]
res.ecb1.fs.vw<-lm(D~Z+X1, weights=weight_ecb1_vw)
est.ecb1.fs.vw=res.ecb1.fs.vw$coefficients[2]
est.ecb1.rte.vw=est.ecb1.rf.vw/est.ecb1.fs.vw
est.ecb1.rte.vw

#####Kitagawa's specification

#logit (for starting values)
logit2 <- glm(Z ~ -1 +X2, family = "binomial"(link = "logit"))
p_log2 <- logit2$fitted.values

#bal
theta <- as.matrix(logit2$coefficients,length(logit2$coefficients),1)
f_loss <- function(theta){-lossfct(theta,Z,X2)}
f_grad <- function(theta){-lossgrad(theta,Z,X2)}
balances <- optim(theta, f_loss , gr = f_grad,method = "BFGS", control = list(maxit = 500))
p_bal2 <- 1/ ( 1 + exp(-X2%*%balances$par))

weight_ecb2<-Z/p_bal2 +(1-Z)/(1-p_bal2)
weight_ecb2_vw<-weight_ecb2*p_log2*(1-p_log2)

res.ecb2.rf<-lm(Y~Z, weights=weight_ecb2)
est.ecb2.rf=res.ecb2.rf$coefficients[2]
res.ecb2.fs<-lm(D~Z, weights=weight_ecb2)
est.ecb2.fs=res.ecb2.fs$coefficients[2]
est.ecb2.rte=est.ecb2.rf/est.ecb2.fs
est.ecb2.rte

res.ecb2.rf.vw<-lm(Y~Z, weights=weight_ecb2_vw)
est.ecb2.rf.vw=res.ecb2.rf.vw$coefficients[2]
res.ecb2.fs.vw<-lm(D~Z, weights=weight_ecb2_vw)
est.ecb2.fs.vw=res.ecb2.fs.vw$coefficients[2]
est.ecb2.rte.vw=est.ecb2.rf.vw/est.ecb2.fs.vw
est.ecb2.rte.vw

#####Kitagawa's specification with reversed instrument
help1<-lm(educ~group_6+group_7+group_8+
            group_13+group_14+group_15+
            group_16+group_25+group_26+group_28, 
          data=CARD[CARD$nearc4==1,])
pred1<-predict(help1, newdata=CARD)

help0<-lm(educ~group_6+group_7+group_8+
            group_13+group_14+group_15+
            group_16+group_25+group_26+group_28, 
          data=CARD[CARD$nearc4==0,])
pred0<-predict(help0, newdata=CARD)

ind=(pred1>=pred0)

Z_rev<-ind*Z+(1-ind)*(1-Z)


#logit (for starting values)
logit3 <- glm(Z_rev ~ -1 +X2, family = "binomial"(link = "logit"))
p_log3 <- logit3$fitted.values

#bal
theta <- as.matrix(logit3$coefficients,length(logit3$coefficients),1)
f_loss <- function(theta){-lossfct(theta,Z_rev,X2)}
f_grad <- function(theta){-lossgrad(theta,Z_rev,X2)}
balances <- optim(theta, f_loss , gr = f_grad,method = "BFGS", control = list(maxit = 500))
p_bal3 <- 1/ ( 1 + exp(-X2%*%balances$par))

weight_ecb3<-Z_rev/p_bal3 +(1-Z_rev)/(1-p_bal3)
weight_ecb3_vw<-weight_ecb3*p_log3*(1-p_log3)

res.ecb3.rf<-lm(Y~Z_rev, weights=weight_ecb3)
est.ecb3.rf=res.ecb3.rf$coefficients[2]
res.ecb3.fs<-lm(D~Z_rev, weights=weight_ecb3)
est.ecb3.fs=res.ecb3.fs$coefficients[2]
est.ecb3.rte=est.ecb3.rf/est.ecb3.fs
est.ecb3.rte

res.ecb3.rf.vw<-lm(Y~Z_rev, weights=weight_ecb3_vw)
est.ecb3.rf.vw=res.ecb3.rf.vw$coefficients[2]
res.ecb3.fs.vw<-lm(D~Z_rev, weights=weight_ecb3_vw)
est.ecb3.fs.vw=res.ecb3.fs.vw$coefficients[2]
est.ecb3.rte.vw=est.ecb3.rf.vw/est.ecb3.fs.vw
est.ecb3.rte.vw


resmat_orig_urban<-c(est.ecb1.rte, est.ecb1.rf, est.ecb1.fs, est.ecb2.rte, est.ecb2.rf, est.ecb2.fs, est.ecb3.rte, est.ecb3.rf, est.ecb3.fs)
resmat_orig_urban_vw<-c(est.ecb1.rte.vw, est.ecb1.rf.vw, est.ecb1.fs.vw, est.ecb2.rte.vw, est.ecb2.rf.vw, est.ecb2.fs.vw, est.ecb3.rte.vw, est.ecb3.rf.vw, est.ecb3.fs.vw)


#Obtain S.E. of LATEs via bootstrapping
n<-length(Y)
est_bs_urban<-matrix(, nrow = B, ncol = 9)
est_bs_urban_vw<-matrix(, nrow = B, ncol = 9)

set.seed(1234)

for (b in seq(1,B)){  
  
  print(b/B)
  #get data
  d <- CARD[sample(nrow(CARD), n, replace=TRUE),]
  
  #define vectors
  D <- d$educ
  X1 <- as.matrix(cbind(d[,4:8],d[, 10:17]))
  X2 <- as.matrix(cbind(d[,23:26], d[,31:34], d[,38:40])) 
  Z <- d$nearc4
  Y <- d$lwage 
  

  #####CARD's specification
  try({
    #logit (for starting values)
    logit1 <- glm(Z ~ -1 +X1, family = "binomial"(link = "logit"))
    p_log1 <- logit1$fitted.values
    
    #bal
    theta <- as.matrix(logit1$coefficients,length(logit1$coefficients),1)
    f_loss <- function(theta){-lossfct(theta,Z,X1)}
    f_grad <- function(theta){-lossgrad(theta,Z,X1)}
    balances <- optim(theta, f_loss , gr = f_grad,method = "BFGS", control = list(maxit = 500))
    p_bal1 <- 1/ ( 1 + exp(-X1%*%balances$par))
    
    weight_ecb1<-Z/p_bal1 +(1-Z)/(1-p_bal1)
    weight_ecb1_vw<-weight_ecb1*p_log1*(1-p_log1)
    
    res.ecb1.rf<-lm(Y~Z+X1, weights=weight_ecb1)
    est.ecb1.rf=res.ecb1.rf$coefficients[2]
    res.ecb1.fs<-lm(D~Z+X1, weights=weight_ecb1)
    est.ecb1.fs=res.ecb1.fs$coefficients[2]
    est.ecb1.rte=est.ecb1.rf/est.ecb1.fs

    res.ecb1.rf.vw<-lm(Y~Z+X1, weights=weight_ecb1_vw)
    est.ecb1.rf.vw=res.ecb1.rf.vw$coefficients[2]
    res.ecb1.fs.vw<-lm(D~Z+X1, weights=weight_ecb1_vw)
    est.ecb1.fs.vw=res.ecb1.fs.vw$coefficients[2]
    est.ecb1.rte.vw=est.ecb1.rf.vw/est.ecb1.fs.vw

  est_bs_urban[b,1] <- est.ecb1.rte
  est_bs_urban[b,2] <- est.ecb1.rf
  est_bs_urban[b,3] <- est.ecb1.fs
  
  est_bs_urban_vw[b,1] <- est.ecb1.rte.vw
  est_bs_urban_vw[b,2] <- est.ecb1.rf.vw
  est_bs_urban_vw[b,3] <- est.ecb1.fs.vw
  }, silent=T)
  
  
  #####Kitagawa's specification
  try({
    
    logit2 <- glm(Z ~ -1 +X2, family = "binomial"(link = "logit"))
    p_log2 <- logit2$fitted.values
    
    #bal
    theta <- as.matrix(logit2$coefficients,length(logit2$coefficients),1)
    f_loss <- function(theta){-lossfct(theta,Z,X2)}
    f_grad <- function(theta){-lossgrad(theta,Z,X2)}
    balances <- optim(theta, f_loss , gr = f_grad,method = "BFGS", control = list(maxit = 500))
    p_bal2 <- 1/ ( 1 + exp(-X2%*%balances$par))
    
    weight_ecb2<-Z/p_bal2 +(1-Z)/(1-p_bal2)
    weight_ecb2_vw<-weight_ecb2*p_log2*(1-p_log2)
    
    res.ecb2.rf<-lm(Y~Z, weights=weight_ecb2)
    est.ecb2.rf=res.ecb2.rf$coefficients[2]
    res.ecb2.fs<-lm(D~Z, weights=weight_ecb2)
    est.ecb2.fs=res.ecb2.fs$coefficients[2]
    est.ecb2.rte=est.ecb2.rf/est.ecb2.fs
    est.ecb2.rte
    
    res.ecb2.rf.vw<-lm(Y~Z, weights=weight_ecb2_vw)
    est.ecb2.rf.vw=res.ecb2.rf.vw$coefficients[2]
    res.ecb2.fs.vw<-lm(D~Z, weights=weight_ecb2_vw)
    est.ecb2.fs.vw=res.ecb2.fs.vw$coefficients[2]
    est.ecb2.rte.vw=est.ecb2.rf.vw/est.ecb2.fs.vw
    est.ecb2.rte.vw
  
  est_bs_urban[b,4] <- est.ecb2.rte
  est_bs_urban[b,5] <- est.ecb2.rf
  est_bs_urban[b,6] <- est.ecb2.fs
  
  est_bs_urban_vw[b,4] <- est.ecb2.rte.vw
  est_bs_urban_vw[b,5] <- est.ecb2.rf.vw
  est_bs_urban_vw[b,6] <- est.ecb2.fs.vw
  }, silent=T)
  
  
  #####Kitagawa's specification with reversed instrument
  try({
    
    help1<-lm(educ~group_6+group_7+group_8+
                group_13+group_14+group_15+
                group_16+group_25+group_26+group_28, 
              data=d[d$nearc4==1,])
    pred1<-predict(help1, newdata=d)
    
    help0<-lm(educ~group_6+group_7+group_8+
                group_13+group_14+group_15+
                group_16+group_25+group_26+group_28, 
              data=d[d$nearc4==0,])
    pred0<-predict(help0, newdata=d)
    
    ind=(pred1>=pred0)
    
    Z_rev<-ind*Z+(1-ind)*(1-Z)
    
    
    
    #logit (for starting values)
    logit3 <- glm(Z_rev ~ -1 +X2, family = "binomial"(link = "logit"))
    p_log3 <- logit3$fitted.values
    
    #bal
    theta <- as.matrix(logit3$coefficients,length(logit3$coefficients),1)
    f_loss <- function(theta){-lossfct(theta,Z_rev,X2)}
    f_grad <- function(theta){-lossgrad(theta,Z_rev,X2)}
    balances <- optim(theta, f_loss , gr = f_grad,method = "BFGS", control = list(maxit = 500))
    p_bal3 <- 1/ ( 1 + exp(-X2%*%balances$par))
    
    weight_ecb3<-Z_rev/p_bal3 +(1-Z_rev)/(1-p_bal3)
    weight_ecb3_vw<-weight_ecb3*p_log3*(1-p_log3)
    
    res.ecb3.rf<-lm(Y~Z_rev, weights=weight_ecb3)
    est.ecb3.rf=res.ecb3.rf$coefficients[2]
    res.ecb3.fs<-lm(D~Z_rev, weights=weight_ecb3)
    est.ecb3.fs=res.ecb3.fs$coefficients[2]
    est.ecb3.rte=est.ecb3.rf/est.ecb3.fs

    res.ecb3.rf.vw<-lm(Y~Z_rev, weights=weight_ecb3_vw)
    est.ecb3.rf.vw=res.ecb3.rf.vw$coefficients[2]
    res.ecb3.fs.vw<-lm(D~Z_rev, weights=weight_ecb3_vw)
    est.ecb3.fs.vw=res.ecb3.fs.vw$coefficients[2]
    est.ecb3.rte.vw=est.ecb3.rf.vw/est.ecb3.fs.vw

  est_bs_urban[b,7] <- est.ecb3.rte
  est_bs_urban[b,8] <- est.ecb3.rf
  est_bs_urban[b,9] <- est.ecb3.fs
  
  est_bs_urban_vw[b,7] <- est.ecb3.rte.vw
  est_bs_urban_vw[b,8] <- est.ecb3.rf.vw
  est_bs_urban_vw[b,9] <- est.ecb3.fs.vw
  }, silent=T)
  

  
  }


stderr_urban<-apply(est_bs_urban, 2, sd, na.rm=TRUE)
stderr_urban_vw<-apply(est_bs_urban_vw, 2, sd, na.rm=TRUE)


###########################Rural sample###########################

CARD <- read_dta("/Users/stefantubbickeemp_lokal/Dropbox/02_IVmatching/CARD_ready_for_R.dta")

CARD<-CARD[CARD$smsa66==0,]

D <- CARD$educ
Z <- CARD$nearc4
X1 <- as.matrix(cbind(CARD[,4:8],CARD[, 10:17]))
X2 <- as.matrix(cbind(CARD[,21:22], CARD[,27:30], CARD[,35:37])) 
Y<-CARD$lwage


#Obtain point estimates of the LATE using the Efficient Covariate Balancing approach by Heiler (2021)

#####CARD's specification

#logit (for starting values)
logit1 <- glm(Z ~ -1 +X1, family = "binomial"(link = "logit"))
p_log1 <- logit1$fitted.values

#bal
theta <- as.matrix(logit1$coefficients,length(logit1$coefficients),1)
f_loss <- function(theta){-lossfct(theta,Z,X1)}
f_grad <- function(theta){-lossgrad(theta,Z,X1)}
balances <- optim(theta, f_loss , gr = f_grad,method = "BFGS", control = list(maxit = 500))
p_bal1 <- 1/ ( 1 + exp(-X1%*%balances$par))

weight_ecb1<-Z/p_bal1 +(1-Z)/(1-p_bal1)
weight_ecb1_vw<-weight_ecb1*p_log1*(1-p_log1)

#check:
summary(lm(Z~X1, weights=weight_ecb1))
#does not achieve full balance (independent of optimization method or tolerance for convergence) 
#add control variables to take imbalance into account 

res.ecb1.rf<-lm(Y~Z+X1, weights=weight_ecb1)
est.ecb1.rf=res.ecb1.rf$coefficients[2]
res.ecb1.fs<-lm(D~Z+X1, weights=weight_ecb1)
est.ecb1.fs=res.ecb1.fs$coefficients[2]
est.ecb1.rte=est.ecb1.rf/est.ecb1.fs
est.ecb1.rte

res.ecb1.rf.vw<-lm(Y~Z+X1, weights=weight_ecb1_vw)
est.ecb1.rf.vw=res.ecb1.rf.vw$coefficients[2]
res.ecb1.fs.vw<-lm(D~Z+X1, weights=weight_ecb1_vw)
est.ecb1.fs.vw=res.ecb1.fs.vw$coefficients[2]
est.ecb1.rte.vw=est.ecb1.rf.vw/est.ecb1.fs.vw
est.ecb1.rte.vw

#####Kitagawa's specification

#logit (for starting values)
logit2 <- glm(Z ~ -1 +X2, family = "binomial"(link = "logit"))
p_log2 <- logit2$fitted.values

#bal
theta <- as.matrix(logit2$coefficients,length(logit2$coefficients),1)
f_loss <- function(theta){-lossfct(theta,Z,X2)}
f_grad <- function(theta){-lossgrad(theta,Z,X2)}
balances <- optim(theta, f_loss , gr = f_grad,method = "BFGS", control = list(maxit = 500))
p_bal2 <- 1/ ( 1 + exp(-X2%*%balances$par))

weight_ecb2<-Z/p_bal2 +(1-Z)/(1-p_bal2)
weight_ecb2_vw<-weight_ecb2*p_log2*(1-p_log2)


#test balance
logit2_after <- glm(Z ~ -1 +X2, family = "binomial"(link = "logit"), weights=weight_ecb2)
pseudor2_2<-1-logit2_after$deviance/logit2_after$null.deviance
waldtest2<-waldtest(logit2_after, test = "Chisq")
pval_2<-waldtest2$`Pr(>Chisq)`

res.ecb2.rf<-lm(Y~Z, weights=weight_ecb2)
est.ecb2.rf=res.ecb2.rf$coefficients[2]
res.ecb2.fs<-lm(D~Z, weights=weight_ecb2)
est.ecb2.fs=res.ecb2.fs$coefficients[2]
est.ecb2.rte=est.ecb2.rf/est.ecb2.fs
est.ecb2.rte

res.ecb2.rf.vw<-lm(Y~Z, weights=weight_ecb2_vw)
est.ecb2.rf.vw=res.ecb2.rf.vw$coefficients[2]
res.ecb2.fs.vw<-lm(D~Z, weights=weight_ecb2_vw)
est.ecb2.fs.vw=res.ecb2.fs.vw$coefficients[2]
est.ecb2.rte.vw=est.ecb2.rf.vw/est.ecb2.fs.vw
est.ecb2.rte.vw

#####Kitagawa's specification with reversed instrument
help1<-lm(educ~group_4+group_9+group_10+group_11+
            group_12+group_19+group_23+
            group_24,
          data=CARD[CARD$nearc4==1,])
pred1<-predict(help1, newdata=CARD)

help0<-lm(educ~group_4+group_9+group_10+group_11+
            group_12+group_19+group_23+
            group_24,
          data=CARD[CARD$nearc4==0,])
pred0<-predict(help0, newdata=CARD)

ind=(pred1>=pred0)

Z_rev<-ind*Z+(1-ind)*(1-Z)


#logit (for starting values)
logit3 <- glm(Z_rev ~ -1 +X2, family = "binomial"(link = "logit"))
p_log3 <- logit3$fitted.values

#bal
theta <- as.matrix(logit3$coefficients,length(logit3$coefficients),1)
f_loss <- function(theta){-lossfct(theta,Z_rev,X2)}
f_grad <- function(theta){-lossgrad(theta,Z_rev,X2)}
balances <- optim(theta, f_loss , gr = f_grad,method = "BFGS", control = list(maxit = 500))
p_bal3 <- 1/ ( 1 + exp(-X2%*%balances$par))

weight_ecb3<-Z_rev/p_bal3 +(1-Z_rev)/(1-p_bal3)
weight_ecb3_vw<-weight_ecb3*p_log3*(1-p_log3)


#test balance
logit3_after <- glm(Z_rev ~ -1 +X2, family = "binomial"(link = "logit"), weights=weight_ecb3)
pseudor2_3<-1-logit3_after$deviance/logit3_after$null.deviance
waldtest3<-waldtest(logit3_after, test = "Chisq")
pval_3<-waldtest3$`Pr(>Chisq)`

res.ecb3.rf<-lm(Y~Z_rev, weights=weight_ecb3)
est.ecb3.rf=res.ecb3.rf$coefficients[2]
res.ecb3.fs<-lm(D~Z_rev, weights=weight_ecb3)
est.ecb3.fs=res.ecb3.fs$coefficients[2]
est.ecb3.rte=est.ecb3.rf/est.ecb3.fs
est.ecb3.rte

res.ecb3.rf.vw<-lm(Y~Z_rev, weights=weight_ecb3_vw)
est.ecb3.rf.vw=res.ecb3.rf.vw$coefficients[2]
res.ecb3.fs.vw<-lm(D~Z_rev, weights=weight_ecb3_vw)
est.ecb3.fs.vw=res.ecb3.fs.vw$coefficients[2]
est.ecb3.rte.vw=est.ecb3.rf.vw/est.ecb3.fs.vw
est.ecb3.rte.vw


resmat_orig_rural<-c(est.ecb1.rte, est.ecb1.rf, est.ecb1.fs,est.ecb2.rte, est.ecb2.rf, est.ecb2.fs, est.ecb3.rte, est.ecb3.rf, est.ecb3.fs)
resmat_orig_rural_vw<-c(est.ecb1.rte.vw, est.ecb1.rf.vw, est.ecb1.fs.vw, est.ecb2.rte.vw, est.ecb2.rf.vw, est.ecb2.fs.vw, est.ecb3.rte.vw, est.ecb3.rf.vw, est.ecb3.fs.vw)


#Obtain S.E. of LATEs via bootstrapping
n<-length(Y)
est_bs_rural<-matrix(, nrow = B, ncol = 9)
est_bs_rural_vw<-matrix(, nrow = B, ncol = 9)

set.seed(1234)

for (b in seq(1,B)){  
  
  print(b/B)
  #get data
  d <- CARD[sample(nrow(CARD), n, replace=TRUE),]
  
  #define vectors
  D <- d$educ
  X1 <- as.matrix(cbind(d[,4:8],d[, 10:17]))
  X2 <- as.matrix(cbind(d[,21:22], d[,27:30], d[,35:37])) 
  Z <- d$nearc4
  Y <- d$lwage 
  
  
  #####CARD's specification
  try({
    #logit (for starting values)
    logit1 <- glm(Z ~ -1 +X1, family = "binomial"(link = "logit"))
    p_log1 <- logit1$fitted.values
    
    #bal
    theta <- as.matrix(logit1$coefficients,length(logit1$coefficients),1)
    f_loss <- function(theta){-lossfct(theta,Z,X1)}
    f_grad <- function(theta){-lossgrad(theta,Z,X1)}
    balances <- optim(theta, f_loss , gr = f_grad,method = "BFGS", control = list(maxit = 500))
    p_bal1 <- 1/ ( 1 + exp(-X1%*%balances$par))
    
    weight_ecb1<-Z/p_bal1 +(1-Z)/(1-p_bal1)
    weight_ecb1_vw<-weight_ecb1*p_log1*(1-p_log1)
    
    res.ecb1.rf<-lm(Y~Z+X1, weights=weight_ecb1)
    est.ecb1.rf=res.ecb1.rf$coefficients[2]
    res.ecb1.fs<-lm(D~Z+X1, weights=weight_ecb1)
    est.ecb1.fs=res.ecb1.fs$coefficients[2]
    est.ecb1.rte=est.ecb1.rf/est.ecb1.fs
    
    res.ecb1.rf.vw<-lm(Y~Z+X1, weights=weight_ecb1_vw)
    est.ecb1.rf.vw=res.ecb1.rf.vw$coefficients[2]
    res.ecb1.fs.vw<-lm(D~Z+X1, weights=weight_ecb1_vw)
    est.ecb1.fs.vw=res.ecb1.fs.vw$coefficients[2]
    est.ecb1.rte.vw=est.ecb1.rf.vw/est.ecb1.fs.vw
    
    est_bs_rural[b,1] <- est.ecb1.rte
    est_bs_rural[b,2] <- est.ecb1.rf
    est_bs_rural[b,3] <- est.ecb1.fs
    
    est_bs_rural_vw[b,1] <- est.ecb1.rte.vw
    est_bs_rural_vw[b,2] <- est.ecb1.rf.vw
    est_bs_rural_vw[b,3] <- est.ecb1.fs.vw
  }, silent=T)
  
  
  #####Kitagawa's specification
  try({
    
    logit2 <- glm(Z ~ -1 +X2, family = "binomial"(link = "logit"))
    p_log2 <- logit2$fitted.values
    
    #bal
    theta <- as.matrix(logit2$coefficients,length(logit2$coefficients),1)
    f_loss <- function(theta){-lossfct(theta,Z,X2)}
    f_grad <- function(theta){-lossgrad(theta,Z,X2)}
    balances <- optim(theta, f_loss , gr = f_grad,method = "BFGS", control = list(maxit = 500))
    p_bal2 <- 1/ ( 1 + exp(-X2%*%balances$par))
    
    weight_ecb2<-Z/p_bal2 +(1-Z)/(1-p_bal2)
    weight_ecb2_vw<-weight_ecb2*p_log2*(1-p_log2)
    
    res.ecb2.rf<-lm(Y~Z, weights=weight_ecb2)
    est.ecb2.rf=res.ecb2.rf$coefficients[2]
    res.ecb2.fs<-lm(D~Z, weights=weight_ecb2)
    est.ecb2.fs=res.ecb2.fs$coefficients[2]
    est.ecb2.rte=est.ecb2.rf/est.ecb2.fs
    est.ecb2.rte
    
    res.ecb2.rf.vw<-lm(Y~Z, weights=weight_ecb2_vw)
    est.ecb2.rf.vw=res.ecb2.rf.vw$coefficients[2]
    res.ecb2.fs.vw<-lm(D~Z, weights=weight_ecb2_vw)
    est.ecb2.fs.vw=res.ecb2.fs.vw$coefficients[2]
    est.ecb2.rte.vw=est.ecb2.rf.vw/est.ecb2.fs.vw
    est.ecb2.rte.vw
    
    est_bs_rural[b,4] <- est.ecb2.rte
    est_bs_rural[b,5] <- est.ecb2.rf
    est_bs_rural[b,6] <- est.ecb2.fs
    
    est_bs_rural_vw[b,4] <- est.ecb2.rte.vw
    est_bs_rural_vw[b,5] <- est.ecb2.rf.vw
    est_bs_rural_vw[b,6] <- est.ecb2.fs.vw
  }, silent=T)
  
  
  #####Kitagawa's specification with reversed instrument
  try({
    
    help1<-lm(educ~group_4+group_9+group_10+group_11+
                group_12+group_19+group_23+
                group_24,
              data=d[d$nearc4==1,])
    pred1<-predict(help1, newdata=d)
    
    help0<-lm(educ~group_4+group_9+group_10+group_11+
                group_12+group_19+group_23+
                group_24,
              data=d[d$nearc4==0,])
    pred0<-predict(help0, newdata=d)
    
    ind=(pred1>=pred0)
    
    Z_rev<-ind*Z+(1-ind)*(1-Z)
    
    
    
    #logit (for starting values)
    logit3 <- glm(Z_rev ~ -1 +X2, family = "binomial"(link = "logit"))
    p_log3 <- logit3$fitted.values
    
    #bal
    theta <- as.matrix(logit3$coefficients,length(logit3$coefficients),1)
    f_loss <- function(theta){-lossfct(theta,Z_rev,X2)}
    f_grad <- function(theta){-lossgrad(theta,Z_rev,X2)}
    balances <- optim(theta, f_loss , gr = f_grad,method = "BFGS", control = list(maxit = 500))
    p_bal3 <- 1/ ( 1 + exp(-X2%*%balances$par))
    
    weight_ecb3<-Z_rev/p_bal3 +(1-Z_rev)/(1-p_bal3)
    weight_ecb3_vw<-weight_ecb3*p_log3*(1-p_log3)
    
    res.ecb3.rf<-lm(Y~Z_rev, weights=weight_ecb3)
    est.ecb3.rf=res.ecb3.rf$coefficients[2]
    res.ecb3.fs<-lm(D~Z_rev, weights=weight_ecb3)
    est.ecb3.fs=res.ecb3.fs$coefficients[2]
    est.ecb3.rte=est.ecb3.rf/est.ecb3.fs
    
    res.ecb3.rf.vw<-lm(Y~Z_rev, weights=weight_ecb3_vw)
    est.ecb3.rf.vw=res.ecb3.rf.vw$coefficients[2]
    res.ecb3.fs.vw<-lm(D~Z_rev, weights=weight_ecb3_vw)
    est.ecb3.fs.vw=res.ecb3.fs.vw$coefficients[2]
    est.ecb3.rte.vw=est.ecb3.rf.vw/est.ecb3.fs.vw
    
    est_bs_rural[b,7] <- est.ecb3.rte
    est_bs_rural[b,8] <- est.ecb3.rf
    est_bs_rural[b,9] <- est.ecb3.fs
    
    est_bs_rural_vw[b,7] <- est.ecb3.rte.vw
    est_bs_rural_vw[b,8] <- est.ecb3.rf.vw
    est_bs_rural_vw[b,9] <- est.ecb3.fs.vw
  }, silent=T)
  
  
  
}


stderr_rural<-apply(est_bs_rural, 2, sd, na.rm=TRUE)
stderr_rural_vw<-apply(est_bs_rural_vw, 2, sd, na.rm=TRUE)


#generate tables with results of heterogeneity analysis


#Card specification
results_ecb_card_hetero=cbind(
  c(resmat_orig[1], stderr[1], resmat_orig[2], stderr[2], resmat_orig[3], stderr[3],
    resmat_orig_urban[1], stderr_urban[1], resmat_orig_urban[2], stderr_urban[2], 
    resmat_orig_urban[3], stderr_urban[3],
    resmat_orig_rural[1], stderr_rural[1], resmat_orig_rural[2], stderr_rural[2], 
    resmat_orig_rural[3], stderr_rural[3]
        ))

results_ecb_card_hetero_vw=cbind(
  c(resmat_orig_vw[1], stderr_vw[1], resmat_orig_vw[2], stderr[2], resmat_orig_vw[3], stderr_vw[3],
    resmat_orig_urban_vw[1], stderr_urban_vw[1], resmat_orig_urban_vw[2], stderr_urban_vw[2], 
    resmat_orig_urban_vw[3], stderr_urban_vw[3],
    resmat_orig_rural_vw[1], stderr_rural_vw[1], resmat_orig_rural_vw[2], stderr_rural_vw[2], 
    resmat_orig_rural_vw[3], stderr_rural_vw[3]
  ))

results_ecb_hetero_card=cbind(results_ecb_card_hetero, results_ecb_card_hetero_vw)

rownames(results_ecb_hetero_card)<-c("A. Full sample with P(Z=1)=0.68\\ Return to college", "", "Reduced form effect", "", "First stage effect", "",
                              "B. Urban sample with P(Z=1)=0.84\\ Return to college", "", "Reduced form effect", "", "First stage effect", "",
                              "C. Rural sample with P(Z=1)=0.39\\ Return to college", "", "Reduced form effect", "", "First stage effect", ""
)

colnames(results_ecb_hetero_card)<-c("IPW(ecb)", "Variance-weighted IPW (ecb)")


write.table(results_ecb_hetero_card, "results_ecb_hetero_card.txt")


#Kitagawa's specification

results_ecb_kitagawa_hetero=
    cbind(c(resmat_orig[4], stderr[4], resmat_orig[5], stderr[5], resmat_orig[6], stderr[6],
                 resmat_orig_urban[4], stderr_urban[4], resmat_orig_urban[5], 
                 stderr_urban[5], resmat_orig_urban[6], stderr_urban[6],
                 resmat_orig_rural[4], stderr_rural[4], resmat_orig_rural[5], 
                 stderr_rural[5], resmat_orig_rural[6], stderr_rural[6]
                 ))

results_ecb_kitagawa_hetero_vw=
  cbind(c(resmat_orig_vw[4], stderr_vw[4], resmat_orig_vw[5], stderr_vw[5], resmat_orig_vw[6], stderr_vw[6],
           resmat_orig_urban_vw[4], stderr_urban_vw[4], resmat_orig_urban_vw[5], 
           stderr_urban_vw[5], resmat_orig_urban_vw[6], stderr_urban_vw[6],
           resmat_orig_rural_vw[4], stderr_rural_vw[4], resmat_orig_rural_vw[5], 
           stderr_rural_vw[5], resmat_orig_rural_vw[6], stderr_rural_vw[6]
  ))

results_ecb_hetero_kitagawa=cbind(results_ecb_kitagawa_hetero, results_ecb_kitagawa_hetero_vw)

rownames(results_ecb_hetero_kitagawa)<-c("A. Full sample with P(Z=1)=0.68\\ Return to college", "", "Reduced form effect", "", "First stage effect", "",
                                     "B. Urban sample with P(Z=1)=0.84\\ Return to college", "", "Reduced form effect", "", "First stage effect", "",
                                     "C. Rural sample with P(Z=1)=0.39\\ Return to college", "", "Reduced form effect", "", "First stage effect", ""
)

colnames(results_ecb_hetero_kitagawa)<-c("IPW(ecb)", "Variance-weighted IPW (ecb)")


write.table(results_ecb_hetero_kitagawa, "results_ecb_hetero_kitagawa.txt")


#Kitagawa's specification with reversed instrument

results_ecb_kitagawa_rev_hetero=
  cbind(c(resmat_orig[7], stderr[7], resmat_orig[8], stderr[8], resmat_orig[9], stderr[9],
          resmat_orig_urban[7], stderr_urban[7], resmat_orig_urban[8], 
          stderr_urban[8], resmat_orig_urban[9], stderr_urban[9],
          resmat_orig_rural[7], stderr_rural[7], resmat_orig_rural[8], 
          stderr_rural[8], resmat_orig_rural[9], stderr_rural[9]
  ))

results_ecb_kitagawa_rev_hetero_vw=
  cbind(c(resmat_orig_vw[7], stderr_vw[7], resmat_orig_vw[8], stderr_vw[8], resmat_orig_vw[9], stderr_vw[9],
          resmat_orig_urban_vw[7], stderr_urban_vw[7], resmat_orig_urban_vw[8], 
          stderr_urban_vw[8], resmat_orig_urban_vw[9], stderr_urban_vw[9],
          resmat_orig_rural_vw[7], stderr_rural_vw[7], resmat_orig_rural_vw[8], 
          stderr_rural_vw[8], resmat_orig_rural_vw[9], stderr_rural_vw[9]
  ))

results_ecb_hetero_kitagawa_rev=cbind(results_ecb_kitagawa_rev_hetero, results_ecb_kitagawa_rev_hetero_vw)

rownames(results_ecb_hetero_kitagawa_rev)<-c("A. Full sample with P(Z=1)=0.68\\ Return to college", "", "Reduced form effect", "", "First stage effect", "",
                                         "B. Urban sample with P(Z=1)=0.84\\ Return to college", "", "Reduced form effect", "", "First stage effect", "",
                                         "C. Rural sample with P(Z=1)=0.39\\ Return to college", "", "Reduced form effect", "", "First stage effect", ""
)

colnames(results_ecb_hetero_kitagawa_rev)<-c("IPW(ecb)", "Variance-weighted IPW (ecb)")


write.table(results_ecb_hetero_kitagawa_rev, "results_ecb_hetero_kitagawa_rev.txt")
